# Supplementary material
Source: PubMed Central journal article supplement (PMC5741416)
Supplement: supp_5.4.E830_2017-0077_STARD_checklist.pdf [file supp_5.4.E830_2017-0077_STARD_checklist.pdf]

|                                                                                                           | YES | NO | UNCERTAIN | NOT APPLICABLE |
|-----------------------------------------------------------------------------------------------------------|-----|----|-----------|----------------|
| <b>TITLE, KEYWORDS, ABSTRACT</b>                                                                          |     |    |           |                |
| Identify article as study of assessing diagnostic accuracy                                                | X   |    |           |                |
| Identify article as a study of administrative data                                                        | X*  |    |           |                |
|                                                                                                           |     |    |           |                |
| <b>INTRODUCTION:</b>                                                                                      |     |    |           |                |
| State disease identification & validation one of goals of study                                           | X   |    |           |                |
|                                                                                                           |     |    |           |                |
| <b>METHODS:</b>                                                                                           |     |    |           |                |
| Participants in validation cohort:                                                                        |     |    |           |                |
| Describe validation cohort (Cohort of patients to which reference standard was applied)                   |     |    |           |                |
| <input type="checkbox"/> Age                                                                              | X   |    |           |                |
| <input type="checkbox"/> Disease                                                                          | X   |    |           |                |
| <input type="checkbox"/> Severity                                                                         |     |    |           | X**            |
| <input type="checkbox"/> Location/Jurisdiction                                                            | X   |    |           |                |
| Describe recruitment of validation cohort                                                                 |     |    |           |                |
| <input type="checkbox"/> Inclusion criteria                                                               | X   |    |           |                |
| <input type="checkbox"/> Exclusion criteria                                                               | X   |    |           |                |
| Describe patient sampling (Random, consecutive, all, etc.)                                                |     |    |           |                |
| Describe data collection                                                                                  |     |    |           |                |
| <input type="checkbox"/> Who identified patients and did selection adhere to patient recruitment criteria | X   |    |           |                |
| <input type="checkbox"/> Who collected data                                                               | X   |    |           |                |
| <input type="checkbox"/> <i>A priori</i> data collection form                                             | X   |    |           |                |
| <input type="checkbox"/> Disease classification                                                           | X   |    |           |                |
| <input type="checkbox"/> Split sample (i.e. re-validation using a separate cohort)                        |     |    |           | X              |
| <b>Test Methods:</b>                                                                                      |     |    |           |                |
| Describe number, training and expertise of persons reading reference standard                             | X   |    |           |                |
| If >1 person reading reference standard, quote measure of consistency (e.g. kappa)                        |     | X  |           |                |

|                                                                                                                                                              |   |      |  |   |
|--------------------------------------------------------------------------------------------------------------------------------------------------------------|---|------|--|---|
| Blinding of interpreters of reference standard to results of classification by administrative data e.g. Chart abstractor blinded to how that chart was coded | X |      |  |   |
| <i>Statistical Methods:</i>                                                                                                                                  |   |      |  |   |
| Describe methods of calculating/comparing diagnostic accuracy                                                                                                | X |      |  |   |
| <b>RESULTS:</b>                                                                                                                                              |   |      |  |   |
| <i>Participants:</i>                                                                                                                                         |   |      |  |   |
| Report when study done, start/end dates of enrollment                                                                                                        |   | X*** |  |   |
| Describe number of people who satisfied inclusion/exclusion criteria                                                                                         | X |      |  |   |
| Study flow diagram                                                                                                                                           |   | X*** |  |   |
| <i>Test results:</i>                                                                                                                                         |   |      |  |   |
| Report distribution of disease severity                                                                                                                      |   |      |  | X |
| Report cross-tabulation of index tests by results of reference standard                                                                                      | X |      |  |   |
| <i>Estimates:</i>                                                                                                                                            |   |      |  |   |
| Report at least 4 estimates of diagnostic accuracy                                                                                                           | X |      |  |   |
| <b>Diagnostic Accuracy Measures Reported:</b>                                                                                                                |   |      |  |   |
| <input type="checkbox"/> Sensitivity                                                                                                                         | X |      |  |   |
| <input type="checkbox"/> Spec                                                                                                                                | X |      |  |   |
| <input type="checkbox"/> PPV                                                                                                                                 | X |      |  |   |
| <input type="checkbox"/> NPV                                                                                                                                 | X |      |  |   |
| <input type="checkbox"/> Likelihood ratios                                                                                                                   |   | X    |  |   |
| <input type="checkbox"/> Kappa                                                                                                                               |   | X    |  |   |
| <input type="checkbox"/> Area under the ROC curve/c-statistic                                                                                                |   | X    |  |   |
| <input type="checkbox"/> Accuracy/agreement                                                                                                                  |   | X    |  |   |
| <input type="checkbox"/> Other (specify)                                                                                                                     |   | X    |  |   |
| Report accuracy for subgroups (e.g. age, geography, different sex, etc.)                                                                                     |   |      |  | X |
| If PPV/NPV reported, ratio of cases/controls of validation                                                                                                   | X |      |  |   |

|                                                              |   |  |  |  |
|--------------------------------------------------------------|---|--|--|--|
| cohort approximate prevalence of condition in the population |   |  |  |  |
| Report 95% confidence intervals for each diagnostic measure  | X |  |  |  |
|                                                              |   |  |  |  |
| DISCUSSION:                                                  |   |  |  |  |
| Discuss the applicability of the validation findings         | X |  |  |  |

\*Our study concerns EMR-derived clinical data, rather than administrative health data

\*\*It was not possible within this data source to adequately assess for severity of illness, so that was not a factor we included in the reference standard and have not reported distribution for severity of illness.

\*\*\* Study dates, including dates of enrollment were listed in the previous study (Williamson et al., 2014) which concerned the same sample as this study for the same period of time (patient data extracted on June 30, 2012). The study flow diagram has also been previously included in Williamson et al. (2014).
